# Supplementary material for: PEGylation of protein-imprinted nanocomposites sandwiching CdTe quantum dots with enhanced fluorescence sensing selectivity
Source: Royal Society of Chemistry journal article supplement (doi:10.1039/c9ra08556d), 2019-01-01
Supplement: c9ra08556d1.pdf [file c9ra08556d1.pdf]

## Supporting Information

PEGylation of protein-imprinted nanocomposites sandwiching CdTe quantum dots with enhanced fluorescent sensing selectivity

Xiao Han<sup>a</sup>, Wenyan Han<sup>b</sup>, Shiting Zhang<sup>a</sup>, Zhiqiang Liu<sup>a</sup>, Guoqi Fu<sup>\*,a</sup>

<sup>a</sup>Key Laboratory of Functional Polymer Materials of Ministry of Education, Institute of Polymer Chemistry, College of Chemistry, Nankai University, Tianjin 300071, China

<sup>b</sup>Key Laboratory of Bioactive Materials of Ministry of Education, College of Life Science, Nankai University, Tianjin 300071, China

\* Corresponding author.

E-mail address: gqfu@nankai.edu.cn

Tel: +86 22 23501443

## Synthesis of PEG-NHS

Polyethylene glycol monomethylether with an average molecular weight of 1900 (1.9 g, 1 mmol) was dissolved in dry dioxane (5 mL) by heating in a water bath of 40 °C, and then the clear solution was cooled to room temperature. To this solution, DSC (0.77g, 3 mmol) and DMAP (0.37g, 3 mmol) dissolved in dry acetone (10 mL) were added. This reaction mixture was magnetically stirred at 25 °C in argon atmosphere for 24 h, and then filtered to remove any solid. The crude product (denoted as PEG-NHS) was precipitated from the supernatant by diethyl ether, and then further purified by three cycles of re-dissolution in acetone and precipitation in diethyl ether. The yield was about 80%.

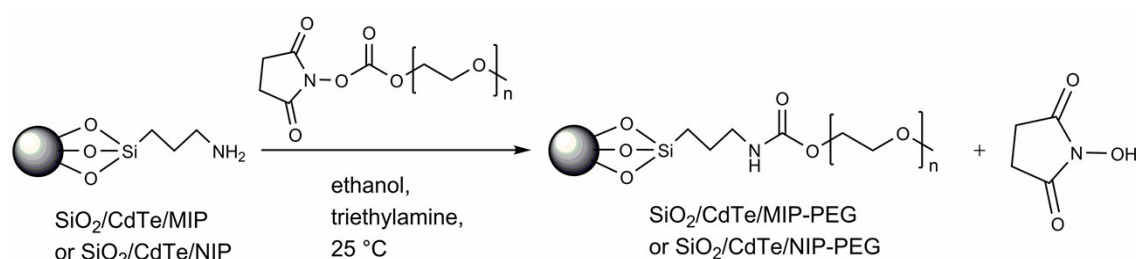

**Scheme S1.** The reaction mechanism for PEGylation of the SiO<sub>2</sub>/CdTe/MIP and SiO<sub>2</sub>/CdTe/NIP nanocomposites.

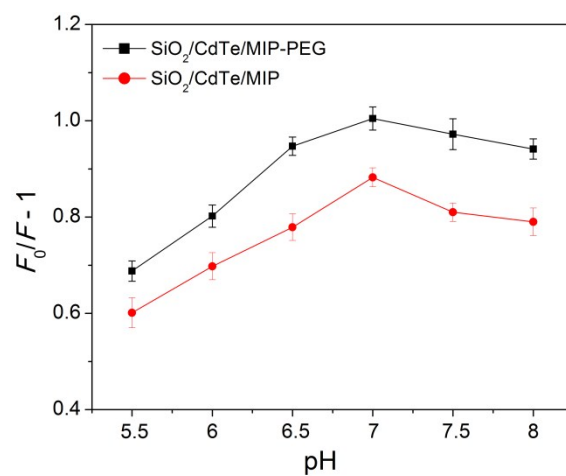

**Fig. S1.** The effect of pH value on quenching efficiency of the SiO<sub>2</sub>/CdTe/MIP-PEG and SiO<sub>2</sub>/CdTe/MIP nanocomposites in the presence of BHB at a concentration of 1.8 μM.

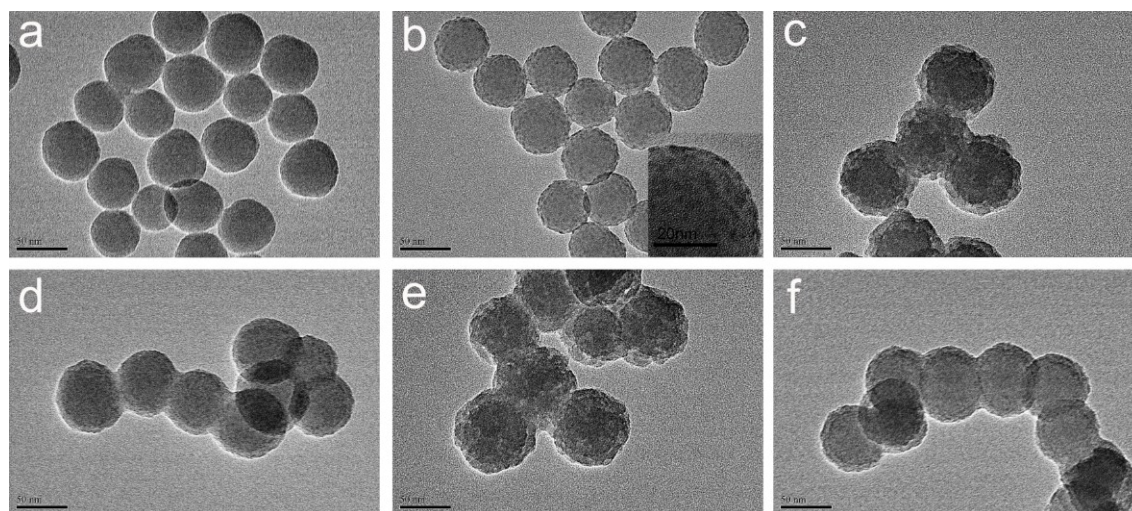

**Fig. S2.** TEM images of (a) SiO<sub>2</sub>-NH<sub>2</sub>, (b) SiO<sub>2</sub>/CdTe, (c) SiO<sub>2</sub>/CdTe/MIP, (d) SiO<sub>2</sub>/CdTe/NIP, (e) SiO<sub>2</sub>/CdTe/MIP-PEG, (f) SiO<sub>2</sub>/CdTe/NIP-PEG nanoparticles. All bars in (a)-(f) represent 50 nm, and that in the inset in (b) represents 20 nm.

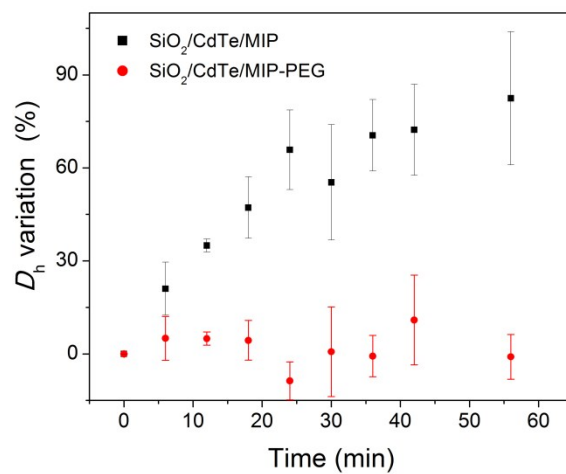

**Fig. S3.** Hydrodynamic diameters ( $D_h$ ) variation of the SiO<sub>2</sub>/CdTe/MIP and SiO<sub>2</sub>/CdTe/MIP-PEG nanoparticles dispersed in phosphate buffer (pH 7.0, 10 mM) as a function of time.

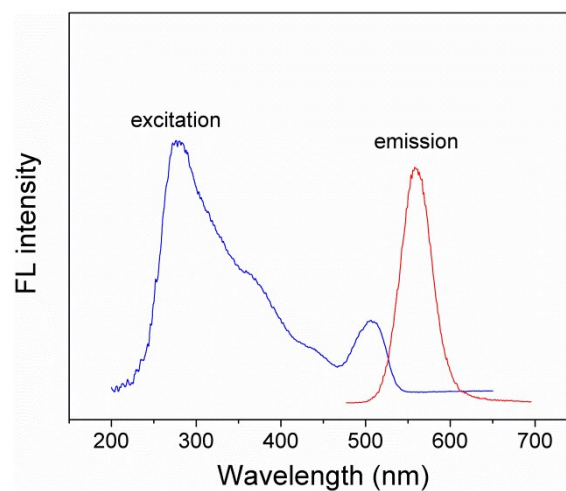

**Fig. S4.** Fluorescent excitation and emission spectra of the prepared CdTe QDs.

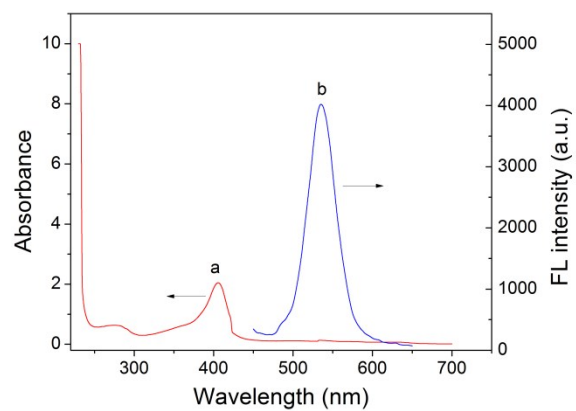

**Fig. S5.** (a) Absorption spectrum of BHb, and (b) fluorescence emission spectrum of the SiO<sub>2</sub>/CdTe/MIP-PEG nanocomposites.
